# Supplementary material
Source: Elsevier journal article supplement (https://www.youngevity.net/images/pdf/MineralMakeup/mmc2.pdf)
Supplement: mmc2 [file mmc2.pdf]

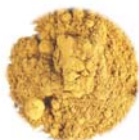**EXQUISITE™**

A medium-dark caramel toned foundation, excellent for Indian, Malaysian, Latina, and Thai women.

Ingredients: Mica, titanium dioxide, iron oxides, ultramarine blue. May also contain zinc oxide.

Item# 161005 - 6 g

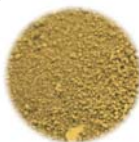**SEDUCTIVE™**

A foundation with deep caramel and red tones, this shade falls in the middle of the darker skin tone range.

Ingredients: Mica, titanium dioxide, iron oxides, ultramarine blue. May also contain zinc oxide.

Item# 161011 - 6 g

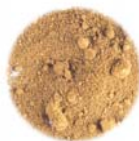**MAGNIFICENT™**

A classic latté tone that primarily accentuates red undertones in African-American skin.

Ingredients: Mica, titanium dioxide, iron oxides, ultramarine blue. May also contain zinc oxide.

Item# 161006 - 6 g

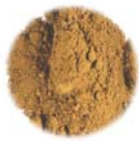**DAZZLING™**

A classic espresso for some of the darkest complexions.

Ingredients: Mica, titanium dioxide, iron oxides, ultramarine blue. May also contain zinc oxide.

Item# 161007 - 6 g

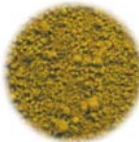**VIVACIOUS™**

For darker skin tones that have more blue and red undertones. This is our second darkest shade available.

Ingredients: Mica, titanium dioxide, iron oxides, ultramarine blue. May also contain zinc oxide.

Item# 161010 - 6 g

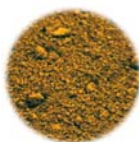**CAPTIVATING™**

A rich, classic, brown shade. Women with very dark complexions appreciate its balanced undertones.

Ingredients: Mica, titanium dioxide, iron oxides, ultramarine blue. May also contain zinc oxide.

Item# 161012 - 6 g
